# Supplementary material for: Making syngas electrocatalytically using a polypyridyl ruthenium catalyst
Source: Royal Society of Chemistry journal article supplement (doi:10.1039/c3cc47251e), 2013-11-07
Supplement: c3cc47251e.pdf [file c3cc47251e.pdf]

## Making Syngas Electrocatalytically by a Polypyridyl Ruthenium Catalyst

Zuofeng Chen, Peng Kang, Ming-Tian Zhang, and Thomas J. Meyer\*

*Department of Chemistry, University of North Carolina at Chapel Hill, Chapel Hill, NC 27599*

### Supporting Information

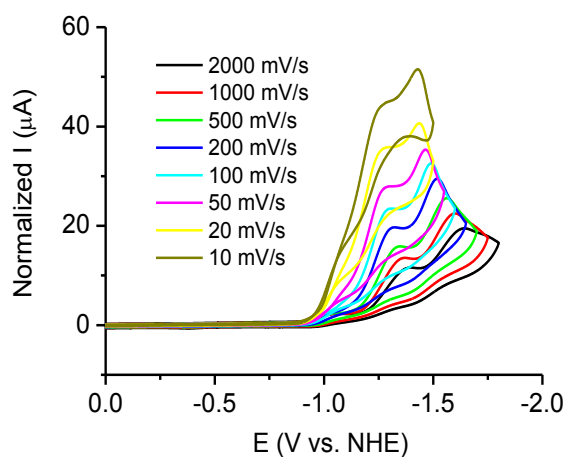

**Figure S1.** Scan rate normalized cyclic voltammograms ( $i/v^{1/2}$ ) of 1 mM **1** in 0.1 M  $n\text{Bu}_4\text{NPF}_6/\text{CH}_3\text{CN}$  with added 10%  $\text{H}_2\text{O}$  under  $\text{CO}_2$  at different scan rates. Electrode, glassy carbon.

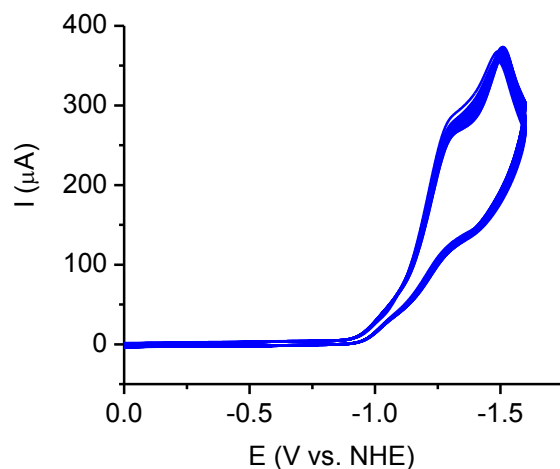

**Figure S2.** Successive cyclic voltammograms (25 cycles) of 1 mM **1** in 0.1 M  $n\text{Bu}_4\text{NPF}_6/\text{CH}_3\text{CN}$  with added 10%  $\text{H}_2\text{O}$  under  $\text{CO}_2$ . Electrode, glassy carbon; scan rate, 100 mV/s.

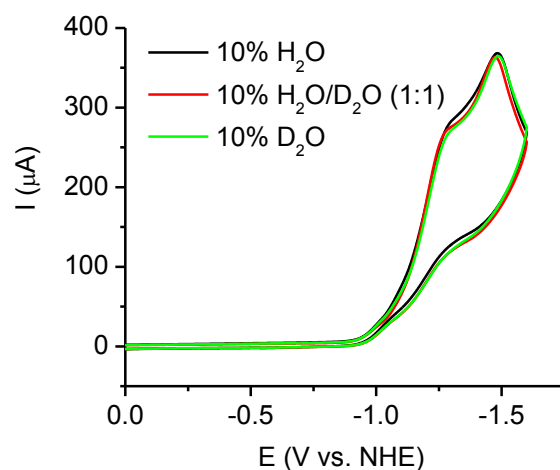

**Figure S3.** Cyclic voltammograms of 1 mM **1** in 0.1 M  $n\text{Bu}_4\text{NPF}_6/\text{CH}_3\text{CN}$  under  $\text{CO}_2$  with added 10%  $\text{H}_2\text{O}$  (black line), 10%  $\text{H}_2\text{O}/\text{D}_2\text{O}$  (1:1) (red line), and 10%  $\text{D}_2\text{O}$  (green line). Electrode, glassy carbon; scan rate, 100 mV/s.
